# Supplementary material
Source: publisher site journal article supplement (https://www.dovepress.com/article/324165)
Supplement: Supplementary file 1 [file get_supplementary_file.php]

## Supplement 1

### Post Anesthesia Discharge Scoring System (PADSS)

---

#### Vital signs

|   |                                  |
|---|----------------------------------|
| 2 | within 20% of preoperative value |
| 1 | 20%-40% of preoperative value    |
| 0 | 40% of preoperative value        |

#### Activity, mental status

|   |                          |
|---|--------------------------|
| 2 | Oriented and steady gait |
| 1 | Oriented or steady gait  |
| 0 | Neither                  |

#### Nausea, and vomiting

|   |          |
|---|----------|
| 2 | Minimal  |
| 1 | Moderate |
| 0 | Severe   |

#### Surgical bleeding

|   |          |
|---|----------|
| 2 | Minimal  |
| 1 | Moderate |
| 0 | Severe   |

#### Pain

|   |          |
|---|----------|
| 2 | Minimal  |
| 1 | Moderate |
| 0 | Severe   |

---

The total score is 10; patients scoring  $\geq 9$  are considered fit for discharge to home.
